# Supplementary material for: Cryo-EM structure of the inner ring from the Xenopus laevis nuclear pore complex
Source: PubMed Central journal article supplement (PMC9061766; doi:10.1038/s41422-022-00633-x), 2022-03-18
Supplement: 41422_2022_633_MOESM3_ESM.pdf [file 41422_2022_633_MOESM3_ESM.pdf]

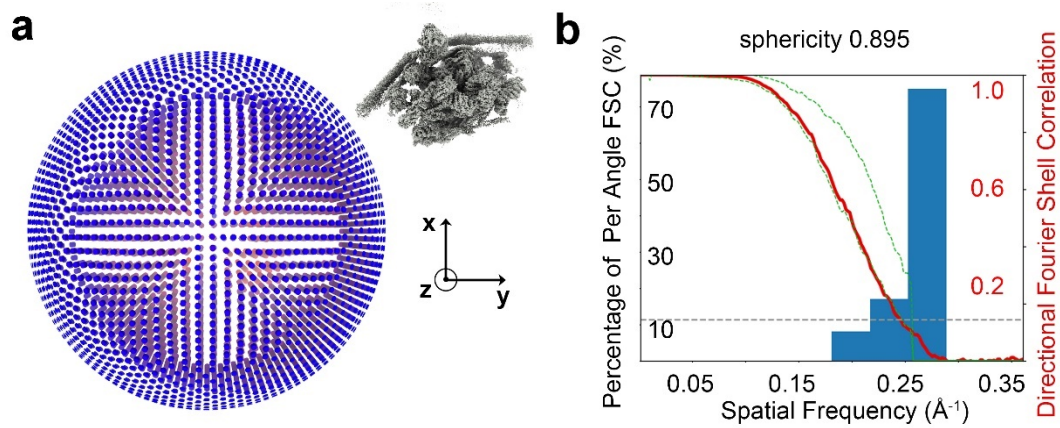

**Supplementary information, Fig. S3 | Cryo-EM analysis of the IR subunit.**

**a**, Angular distribution of the single-particle cryo-EM reconstruction for the IR subunit. Each cylinder represents one view and the height of the cylinder is proportional to the number of particles for that view. **b**, Directional Fourier Shell correlation (FSC) curves and directional FSC histograms for cryo-EM reconstruction of the IR subunit. The directional FSC curve was calculated using the website <https://3dfsc.salk.edu><sup>1</sup>.

**Reference**

1 Tan YZ, Baldwin PR, Davis JH et al. Addressing preferred specimen orientation in single-particle cryo-EM through tilting. *Nat Methods* 2017; 14:793-796.
