# Supplementary material for: Cryo-EM structure of the inner ring from the Xenopus laevis nuclear pore complex
Source: PubMed Central journal article supplement (PMC9061766; doi:10.1038/s41422-022-00633-x), 2022-03-18
Supplement: 41422_2022_633_MOESM11_ESM.pdf [file 41422_2022_633_MOESM11_ESM.pdf]

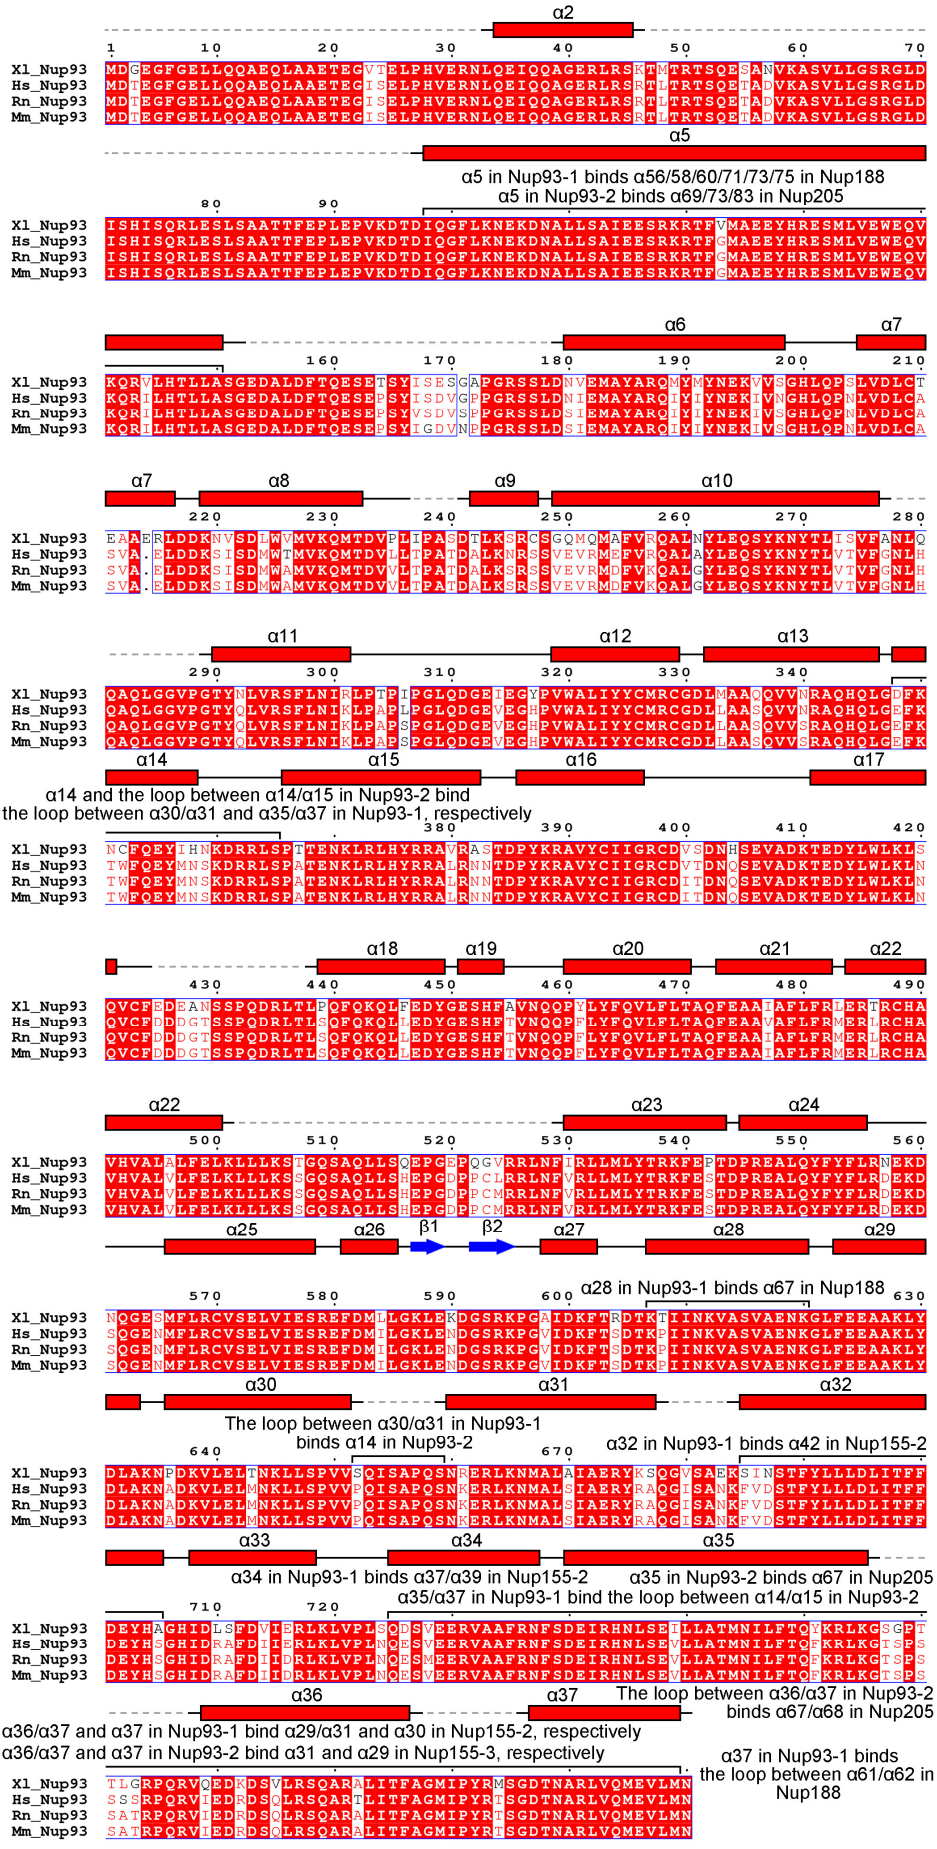

**Supplementary information, Fig. S11 | Sequence alignment of Nup93 orthologues from *X. laevis* (Xl), *Homo sapiens* (Hs), *Rattus norvegicus* (Rn), and *Mus musculus* (Mm).**

Shown here is the sequence alignment of the full-length Nup93 from indicated species. Conserved residues are boxed, with invariant ones shaded red. The secondary structural elements in Nup93-1 are indicated above the sequences. Structural elements interacting with other nucleoporins in the IR subunit are indicated.
