# Supplementary material for: Cryo-EM structure of the inner ring from the Xenopus laevis nuclear pore complex
Source: PubMed Central journal article supplement (PMC9061766; doi:10.1038/s41422-022-00633-x), 2022-03-18
Supplement: 41422_2022_633_MOESM15_ESM.pdf [file 41422_2022_633_MOESM15_ESM.pdf]

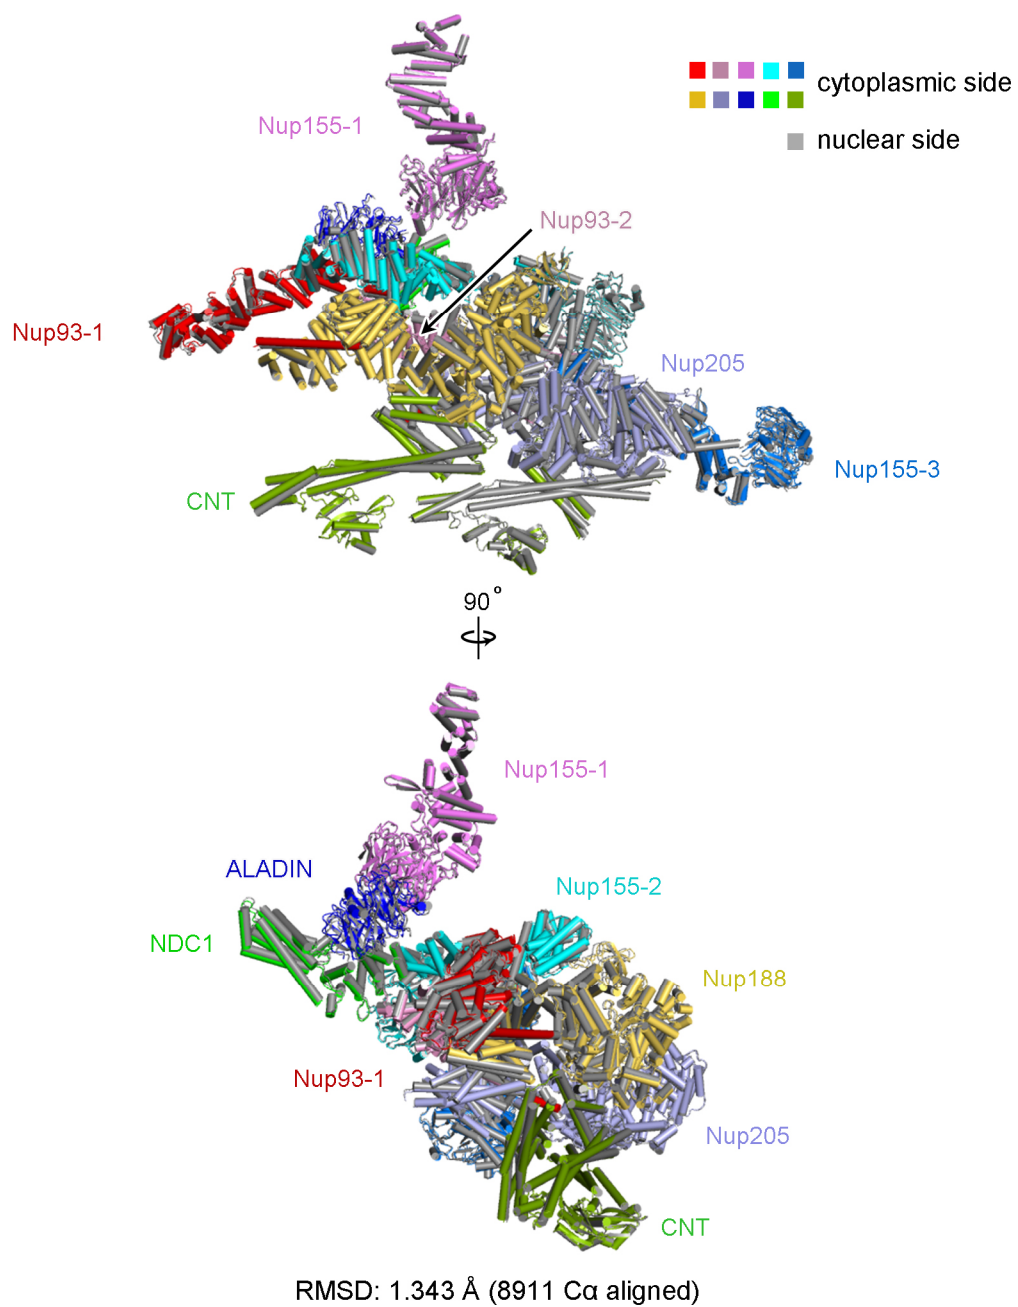

**Supplementary information, Fig. S15 | The two halves of the IR subunit are nearly identical.**

The two halves of the IR subunit can be superimposed with a root-mean-squared deviation (RMSD) of  $\sim 1.34$  Å over 8,911 aligned C $\alpha$  atoms. Two perpendicular views are shown.
