# Supplementary material for: Cryo-EM structure of the inner ring from the Xenopus laevis nuclear pore complex
Source: PubMed Central journal article supplement (PMC9061766; doi:10.1038/s41422-022-00633-x), 2022-03-18
Supplement: 41422_2022_633_MOESM16_ESM.pdf [file 41422_2022_633_MOESM16_ESM.pdf]

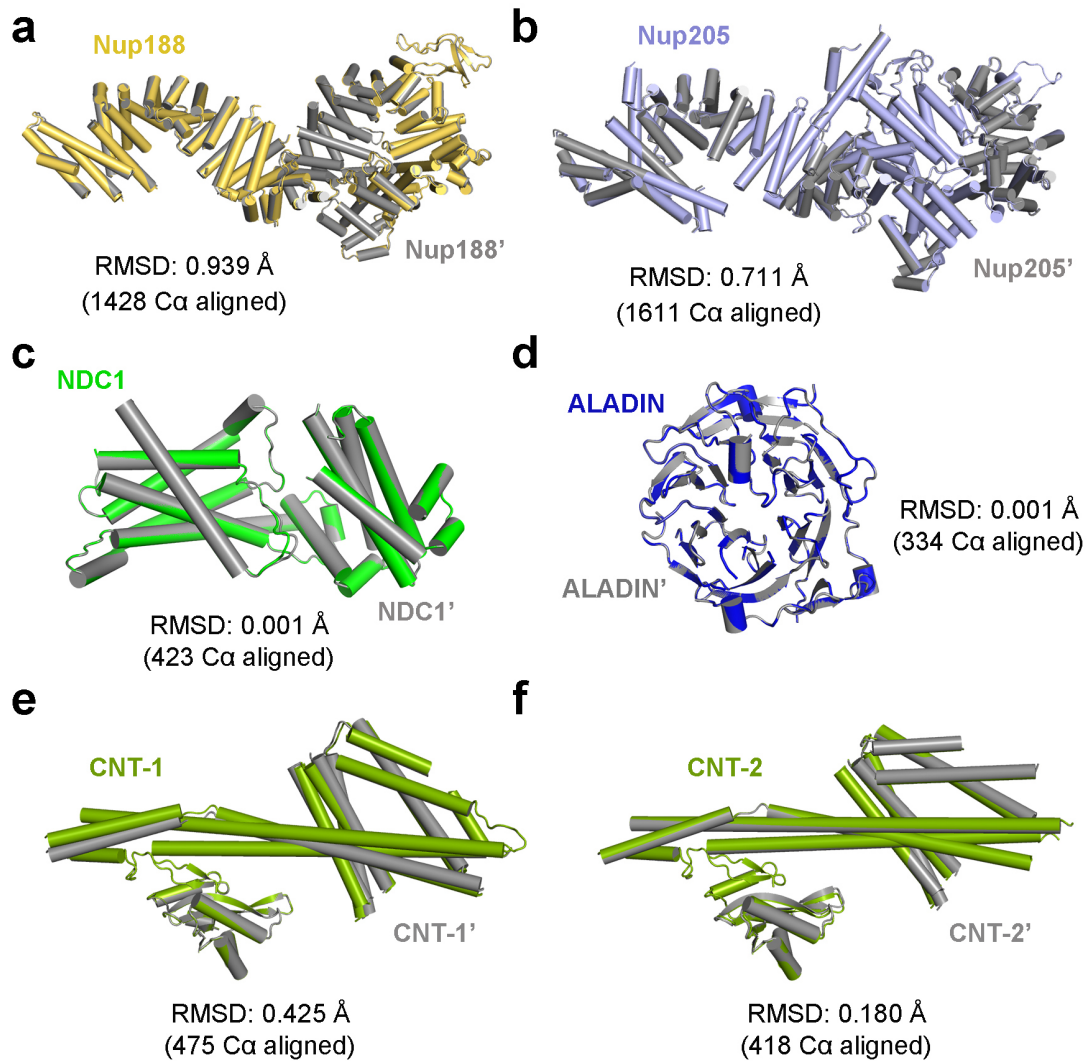

**Supplementary information, Fig. S16 | Structural comparison of corresponding IR nucleoporins on the cytoplasmic and the nuclear sides.**

Structures of the indicated components on the cytoplasmic side are color coded, and the corresponding ones on the nuclear side are colored grey and denoted with an apostrophe.
