# Supplementary material for: Cryo-EM structure of the inner ring from the Xenopus laevis nuclear pore complex
Source: PubMed Central journal article supplement (PMC9061766; doi:10.1038/s41422-022-00633-x), 2022-03-18
Supplement: 41422_2022_633_MOESM20_ESM.pdf [file 41422_2022_633_MOESM20_ESM.pdf]

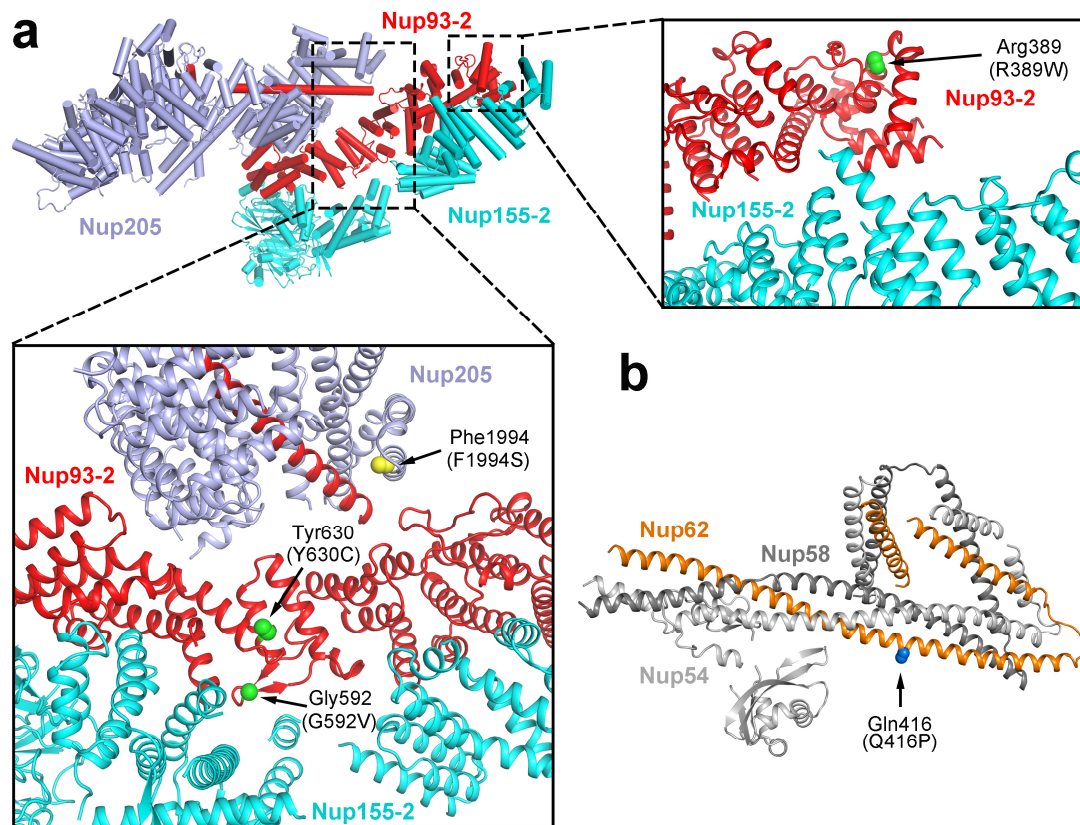

**Supplementary information, Fig. S20 | Structural mapping of disease-derived mutations onto components of the IR subunit.**

**a**, Mapping of four residues that are targeted for mutations in steroid-resistant nephrotic syndrome (SRNS)<sup>1</sup>. These four residues are Arg389/Gly592/Tyr630 in Nup93 and Phe1994 in Nup205. The mutations, R389W, Y630C, G592V and F1994S, may alter the local conformation. **b**, Mapping of the disease autosomal recessive infantile bilateral striatal necrosis (IBSN) mutation Q416P in Nup62<sup>2</sup>. The mutation of Gln416 to a helix-breaking residue Pro in the middle of an extended helix may destabilize the helical conformation.

**References**

- 1 Braun, D. A. et al. Mutations in nuclear pore genes NUP93, NUP205 and XPO5 cause steroid-resistant nephrotic syndrome. *Nat Genet* 48, 457-465, doi:10.1038/ng.3512 (2016).
- 2 Basel-Vanagaite, L. et al. Mutated nup62 causes autosomal recessive infantile bilateral striatal necrosis. *Ann Neurol* 60, 214-222, doi:10.1002/ana.20902 (2006).
