# Supplementary material for: Cryo-EM structure of the inner ring from the Xenopus laevis nuclear pore complex
Source: PubMed Central journal article supplement (PMC9061766; doi:10.1038/s41422-022-00633-x), 2022-03-18
Supplement: 41422_2022_633_MOESM25_ESM.pdf [file 41422_2022_633_MOESM25_ESM.pdf]

**Supplementary information, Table S2 | Summary of model building for the IR subunit of the *X. laevis* NPC.**

|                   | Molecule<br><b>Vertebrates/</b><br>Yeast | Copy<br>No. | Length<br><i>Xenopus</i><br><i>laevis</i> | UniProt No.<br><i>Xenopus</i><br><i>laevis</i> | PDB code         | Modeling | Model<br>length | Resolution<br>(Å) | Chain ID<br>CR/NR side |
|-------------------|------------------------------------------|-------------|-------------------------------------------|------------------------------------------------|------------------|----------|-----------------|-------------------|------------------------|
| <b>IR subunit</b> | <b>Nup205</b> /Nup192                    | 2           | 2011                                      | Q642R6                                         | 7FIK             | RD       | ~1700           | 4.0~5.5           | A/a                    |
|                   | <b>Nup188</b> /Nup188                    | 2           | 1739                                      | F6WXT2                                         | AF/4KF7/4<br>KF8 | HM/RD    | ~1500           | 4.0~5.5           | B/b                    |
|                   | <b>Nup93</b> /Nic96                      | 4           | 820                                       | Q7ZX96                                         | 7FIK             | RD       | ~630            | 4.5~5.5           | C/E/c/e                |
|                   | <b>Nup155</b> /Nup155                    | 6           | 1388                                      | F6UHT0                                         | AF               | RD       | ~1150           | 4.5~6.0           | D/F/M/d/f/m            |
|                   | <b>Nup62</b> /Nsp1                       | 4           | 552                                       | Q6DIE3                                         | AF/5C3L          | RD       | ~170            | 5.0~6.5           | H/L/h/l                |
|                   | <b>Nup58</b> /Nup49                      | 4           | 599                                       | Q5EAX5                                         | AF/5C3L          | RD       | ~170            | 5.0~6.5           | I/K/i/k                |
|                   | <b>Nup54</b> /Nup57                      | 4           | 535                                       | K9ZTJ6                                         | AF/5C3L          | RD       | ~320            | 5.0~6.5           | G/J/g/j                |
|                   | <b>NDC1</b> /NDC1                        | 2           | 660                                       | Q6AX31                                         | AF               | RD       | ~430            | 5.5~6.5           | N/n                    |
| <b>ALADIN</b> /-  | 2                                        | 523         | Q6DCM0                                    | AF                                             | RD               | ~370     | 5.5~6.5         | O/o               |                        |

Under the column labeled “Molecule”, corresponding proteins from vertebrates and yeasts are listed, with vertebrate components in bold. Under the column labeled “PDB code”, AF stands for AlphaFold (model generated from AlphaFold prediction). Under the column labeled “Modeling”, HM stands for homology modeling, and RD stands for rigid docking and manual adjustment.
