# Supplementary material for: Cryo-EM structure of the inner ring from the Xenopus laevis nuclear pore complex
Source: PubMed Central journal article supplement (PMC9061766; doi:10.1038/s41422-022-00633-x), 2022-03-18
Supplement: 41422_2022_633_MOESM26_ESM.pdf [file 41422_2022_633_MOESM26_ESM.pdf]

**Supplementary information, Table S3 | Summary of secondary structural elements in the structurally resolved nucleoporins of the IR subunit from the *X. laevis* NPC.**

| Protein  | Full length (aa) | Residues modeled |              | Number of $\alpha$ -helices |              | Number of $\beta$ -strands |              |
|----------|------------------|------------------|--------------|-----------------------------|--------------|----------------------------|--------------|
|          |                  | cytoplasmic side | nuclear side | cytoplasmic side            | nuclear side | cytoplasmic side           | nuclear side |
| Nup205   | 2011             | 1709             | 1690         | 86                          | 86           | 4                          | 4            |
| Nup188   | 1739             | 1502             | 1502         | 75                          | 75           | 5                          | 5            |
| Nup93-1  | 820              | 641              | 641          | 32                          | 32           | 2                          | 2            |
| Nup93-2  |                  | 633              | 634          | 32                          | 32           | 2                          | 2            |
| Nup155-1 | 1388             | 880              | 880          | 28                          | 28           | 34                         | 34           |
| Nup155-2 |                  | 1129             | 1138         | 44                          | 44           | 34                         | 34           |
| Nup155-3 |                  | 1111             | 1111         | 44                          | 44           | 34                         | 34           |
| Nup62-1  | 552              | 166              | 163          | 3                           | 3            | 0                          | 0            |
| Nup62-2  |                  | 159              | 159          | 3                           | 3            | 0                          | 0            |
| Nup58-1  | 599              | 171              | 171          | 4                           | 4            | 0                          | 0            |
| Nup58-2  |                  | 166              | 166          | 4                           | 4            | 0                          | 0            |
| Nup54-1  | 535              | 219              | 198          | 6                           | 6            | 2                          | 2            |
| Nup54-2  |                  | 218              | 198          | 6                           | 6            | 2                          | 2            |
| NDC1     | 660              | 431              | 431          | 18                          | 18           | 0                          | 0            |
| ALADIN   | 523              | 367              | 367          | 1                           | 1            | 29                         | 29           |
